# Supplementary material
Source: PubMed Central journal article supplement (PMC3854894)
Supplement: SD4.pdf [file SD4.pdf]

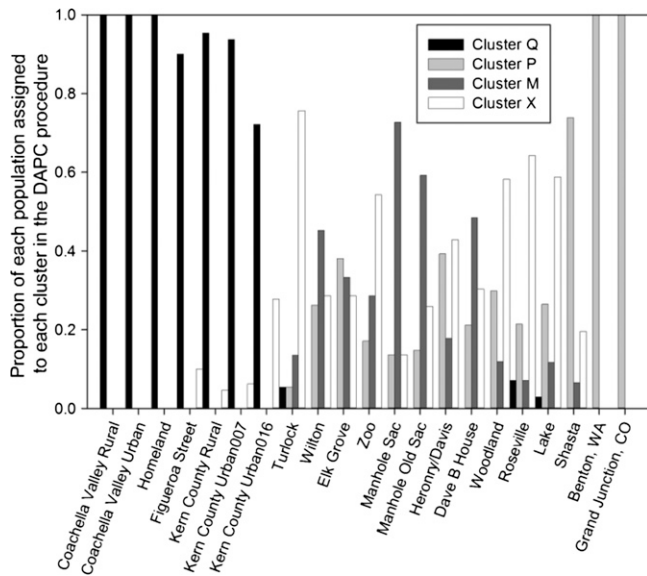

SUPPLEMENTAL FIGURE 1. Cluster assignments by population for Discriminant Analysis of Principal Components (DAPC). Individual mosquitoes were grouped by population for this analysis, but four clusters were specified, to coincide with four clusters found by Structure.

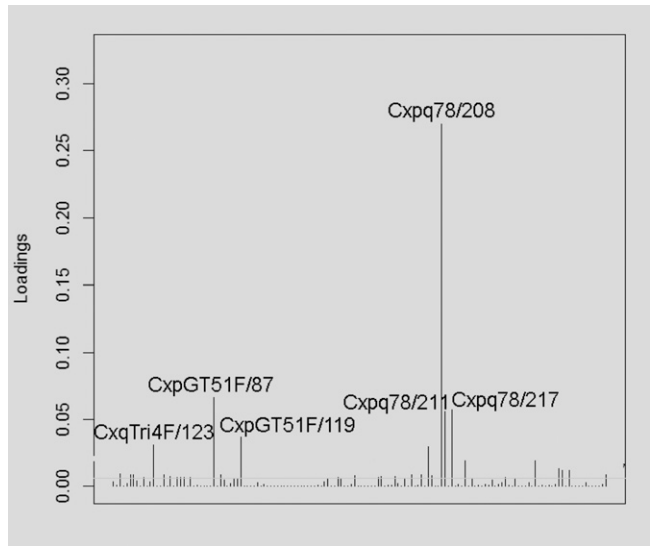

SUPPLEMENTAL FIGURE 2. Discriminant Analysis of Principal Components Loading Plot. Plot shows which alleles are best at discriminating among clusters. The six most informative alleles are shown as the locus name, followed by the allele size in basepairs.

SUPPLEMENTAL TABLE 1  
Collection date, trap nights and collection methods used in this study, California\*

| Site                   | Month of trapping | Year of trapping | Trap nights | Collection method                    |
|------------------------|-------------------|------------------|-------------|--------------------------------------|
| Coachella Valley Rural | September         | 2010             | 1           | CO <sub>2</sub> -baited trap         |
| Coachella Valley Urban | September         | 2010             | 1           | Gravid trap                          |
| Homeland               | December          | 2010             | 1           | EVS suction trap, no CO <sub>2</sub> |
| Figuroa Street         | March             | 2011             | 1           | gravid trap                          |
|                        | December          | 2010             | 1           | EVS suction trap, no CO <sub>2</sub> |
| Kern County Rural      | September         | 2010             | 2           | Gravid trap                          |
|                        | September         | 2010             | 1           | Gravid trap                          |
| Kern County Urban 007  | September         | 2010             | 1           | Gravid trap                          |
| Kern County Urban 016  | September         | 2010             | 1           | Gravid trap                          |
| Turlock                | June              | 2011             | 9           | Gravid trap                          |
| Wilton                 | January           | 2012             |             | Vacuum aspiration                    |
| Elk Grove              | October           | 2011             |             | Vacuum aspiration                    |
| Zoo                    | April             | 2011             |             | Vacuum aspiration                    |
|                        | July              | 2011             |             | Vacuum aspiration                    |
| Manhole Sacramento     | October           | 2010             |             | Vacuum aspiration                    |
| Manhole Old Sacramento | July              | 2011             |             | Vacuum aspiration                    |
| Heronry/Davis          | July              | 2011             | 1           | Gravid trap                          |
| Dave B House           | June              | 2011             | 1           | Gravid trap                          |
| Woodland               | July              | 2011             | 1           | Gravid trap                          |
| Roseville              | June              | 2010             |             | Larval collection                    |
| Lake                   | July–September    | 2011             | 15          | CO <sub>2</sub> -baited trap         |
|                        | July–September    | 2011             | 6           | Gravid trap                          |
|                        | July–September    | 2011             |             | Vacuum aspiration                    |
| Shasta                 | July              | 2011             | 1           | CO <sub>2</sub> -baited trap         |
|                        |                   | 2011             | 1           | Hock light trap                      |
| Benton                 | August            | 2010             | 1           | CO <sub>2</sub> -baited trap         |

\*EVS = encephalitis vector survey.

SUPPLEMENTAL TABLE 2  
Microsatellite loci used in this study, California\*

| Locus     | Dye | Size    | No. | Multiplex | Concentration of each primer, $\mu$ M | Source |
|-----------|-----|---------|-----|-----------|---------------------------------------|--------|
| Cxpq51    | D3  | 162–191 | 8   | 1         | 0.05                                  | A      |
| Cxpq59    | D4  | 100–118 | 7   | 1         | 0.02                                  | A      |
| Cxpq68    | D4  | 197–213 | 6   | 1         | 0.01                                  | A      |
| Cxpq69    | D3  | 280–304 | 9   | 1         | 0.50                                  | A      |
| Cxpq78    | D2  | 208–226 | 7   | 1         | 0.08                                  | A      |
| Cxpq79    | D4  | 309–337 | 6   | 1         | 0.08                                  | A      |
| Cxpq109   | D2  | 267–293 | 8   | 2         | 0.70                                  | A      |
| Cxpq110   | D4  | 186–219 | 9   | 2         | 0.40                                  | A      |
| Cxpq114   | D4  | 104–119 | 6   | 2         | 0.05                                  | A      |
| Cxpq117   | D3  | 306–315 | 4   | 2         | 0.40                                  | A      |
| Cxpq119   | D3  | 212–227 | 6   | 2         | 0.10                                  | A      |
| CxqGT4F   | D4  | 137–156 | 7   | 2         | 0.09                                  | B      |
| CxqTri4F  | D2  | 111–126 | 6   | 2         | 0.04                                  | B      |
| CxpGT46F  | D3  | 259–287 | 16  | 2         | 0.25                                  | C      |
| CxpGT51F  | D2  | 87–173  | 25  | 1         | 0.27                                  | C      |
| CxqCTG10  | D3  | 98–116  | 6   | 1         | 0.05                                  | D      |
| CxqCAG101 | D3  | 184–193 | 4   | 2         | 0.13                                  | D      |

\*Dye = fluorescent label (D2 = black, D3 = green, D4 = blue); Size = range of allele sizes in basepairs; Multiplex = multiplex of which this locus is part; Source = original source of locus: A<sup>54</sup>; B<sup>55</sup>; C<sup>56</sup>; D.<sup>57</sup>
